# Supplementary material for: Mono-(2-ethyl-5-hydroxyhexyl) phthalate promotes uterine leiomyoma cell survival through tryptophan-kynurenine-AHR pathway activation
Source: PubMed Central journal article supplement — Proc Natl Acad Sci U S A. 2022 Nov 14;119(47):e2208886119. doi: 10.1073/pnas.2208886119 (PMC9704719; doi:10.1073/pnas.2208886119), 2022-11-14
Supplement: pnas.2208886119.sapp.pdf [file pnas.2208886119.sapp.pdf]

## Supplementary Information for

Mono (2-ethyl-5-hydroxyhexyl) phthalate promotes uterine leiomyoma cell survival through tryptophan-kynurenine-AHR pathway activation

Takashi Iizuka<sup>a</sup>, Ping Yin<sup>a</sup>, Azna Zuberi<sup>a</sup>, Stacy Kujawa<sup>a</sup>, John S. Coon V<sup>a</sup>, Richelle D. Björvang<sup>b</sup>, Pauliina Damdimopoulou<sup>b</sup>, Diana C. Pacyga<sup>c</sup>, Rita S. Strakovsky<sup>c</sup>, Jodi A. Flaws<sup>d</sup>, and Serdar E. Bulun<sup>a,1</sup>

<sup>a</sup>Division of Reproductive Science in Medicine, Department of Obstetrics and Gynecology, Feinberg School of Medicine, Northwestern University, Chicago, Illinois, 60610

<sup>b</sup>Division of Obstetrics and Gynecology, Department of Clinical Science, Intervention and Technology, Karolinska Institute and Karolinska University Hospital, Stockholm, Sweden

<sup>c</sup>Department of Food Science and Human Nutrition, Institute for Integrative Toxicology, Michigan State University, East Lansing, Michigan, 48824

<sup>d</sup>Department of Comparative Bioscience, University of Illinois, Urbana, Illinois, 61802

<sup>1</sup>Corresponding author: Serdar E. Bulun  
Email: s-bulun@northwestern.edu

### This PDF file includes:

- Supplementary text
- Figures S1 to S7
- Tables S1 to S8
- SI References

## **[Methods]**

### ***Weighted Quantile Sum modeling to define the bad actor (BAD) effect-based phthalate mixture***

We conducted WQS modeling following the four-step method described by Bornehag *et al* (1). WQS is a statistical model for highly correlated data such as those encountered in environmental exposures. It is a mixture effect strategy that functions as dimensionality reduction to assess the association of the mixture with an outcome and determine the contributions of each component in the mixture to the overall effect. We focused on WQS modeling Step 1 “identification of bad-acting chemicals,” and Step 2 “construction of a typical mixture” for our experimental studies. In Step 1, the WQS model is built to test associations between urinary phthalate levels and serum estradiol concentrations based on results from the MWHS cohort (2). Briefly, for each study participant (all women), urinary phthalates were measured by HPLC-MS/MS from four separate spot urine samples that were pooled. The measured levels were specific gravity-adjusted and presented in ng/mL. Serum samples were collected at four visits over four consecutive weeks and used for steroid hormone measurements. Serum estrogen levels were averaged across the menstrual cycle to obtain an average hormone concentration for each woman. For statistical modeling, phthalate levels were divided into quartiles and estradiol levels were log-transformed. Both positive and negative associations were tested. Individual chemicals were also tested using linear models. Co-variables used were menopausal status, race, body mass index (BMI), and smoking. Statistical analyses were done using the gWQS package in R. To compare WQS findings with individual chemical analyses, linear models were used. The WQS model was built on the subset of women from the MWHS cohort where data on outcomes and covariates were available (n=654; Table S7). The BAD mixture was based on the geometrical mean values from the full cohort (N=765) (Table S8).

### ***RNA-seq data analysis***

To explore the gene expression of SLC7A5 and SLC7A8, we analyzed previously published three RNA-seq datasets containing LM and matched MM tissue samples: GSE120854 (3), GSE128242 (4), and GSE142329 dataset (5). The matched MM tissue sample was used as the control to normalize the gene expression.

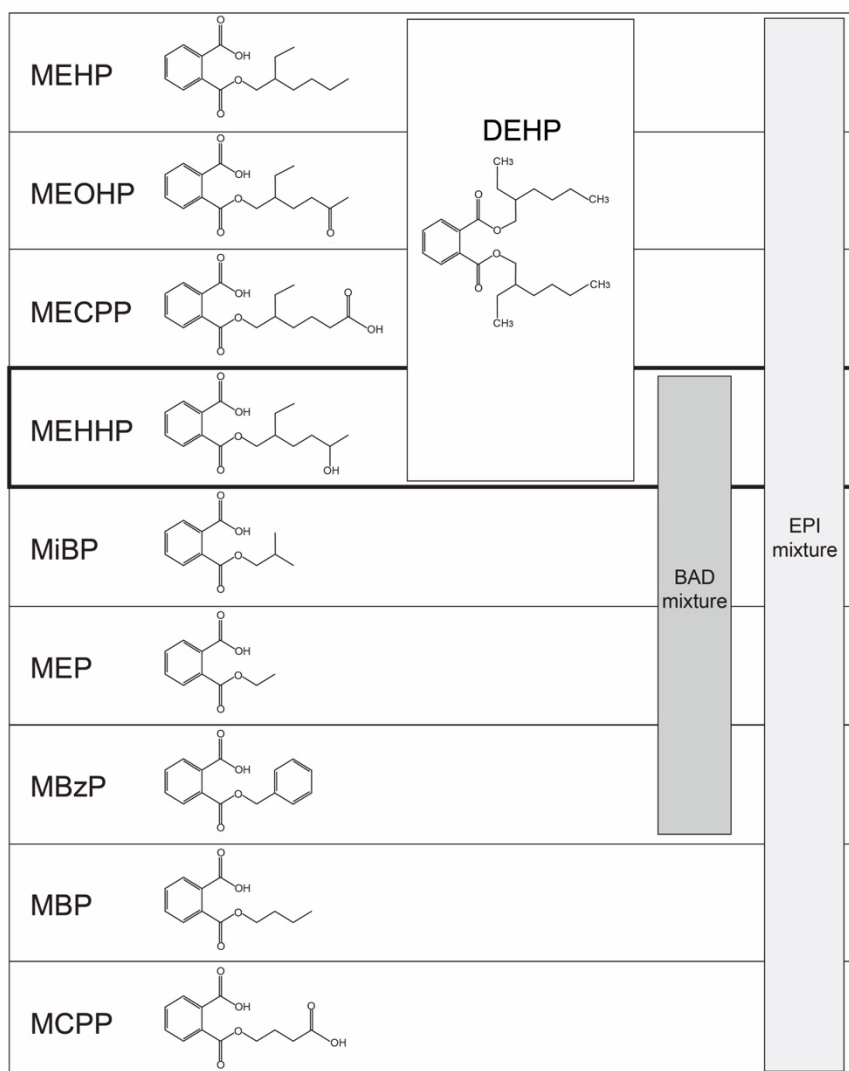

**Figure S1. The composition of DEHP metabolites in the BAD (effect-based) mixture and EPI (exposure-based) mixture.**

The EPI mixture (contains all nine phthalate metabolites shown), BAD mixture (contains MEHHP, MiBP, MEP, and MBzP), MEHHP alone, and DEHP alone (the parent compound of MEHP, MEOHP, MECPP, and MEHHP) were used in this study. BAD, bad actor (effect-based) mixture; EPI, epidemiological (exposure-based) mixture; DEHP, bis(2-ethylhexyl)phthalate; MBP, mono-butyl phthalate; MBzP, mono-benzyl phthalate; MCPP, mono-(3-carboxypropyl) phthalate; MECPP, mono-(2-ethyl-5-carboxypentyl) phthalate; MEHHP, mono-(2-ethyl-5-hydroxyhexyl) phthalate; MEHP, mono-(2-ethylhexyl) phthalate; MEOHP, mono-(2-ethyl-5-oxohexyl) phthalate; MEP, mono-ethyl phthalate; MiBP, mono-isobutyl phthalate.

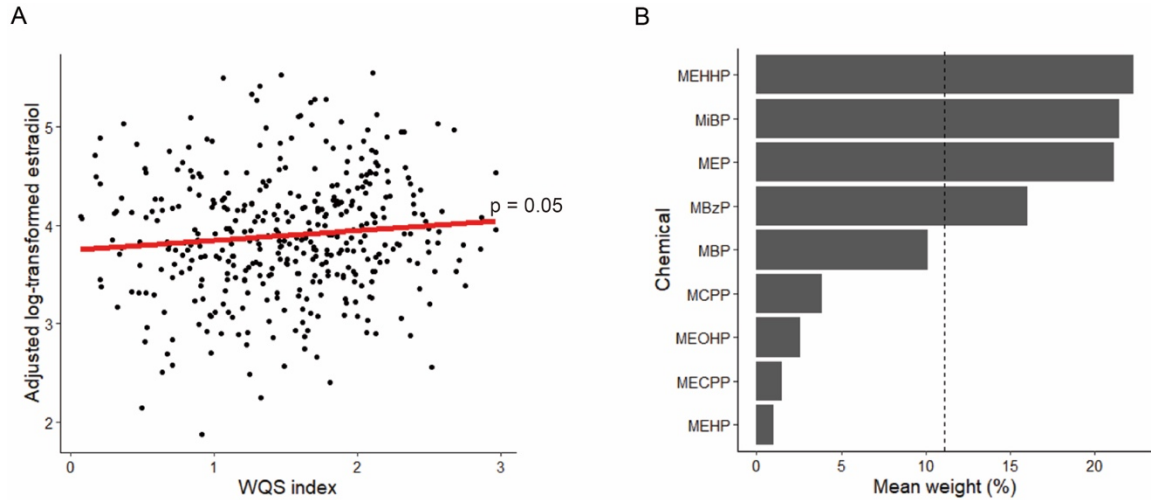

**Figure S2. Association of serum estradiol with mixtures and weights of phthalate metabolites in urine.**

A: Weighted Quantile Sum (WQS) model demonstrating the association between urinary levels of nine phthalate metabolites (MEHHP, MiBP, MEP, MBzP, MBP, MCP, MEOHP, MECPP, and MEHP) and serum estradiol concentrations. The model shows a 0.1 increase in log-transformed estradiol concentration for every quartile increase in the WQS index. B: Bar graph showing the weights for each metabolite; the four metabolites ranked at the top of the list comprise the BAD (effect-based) mixture.

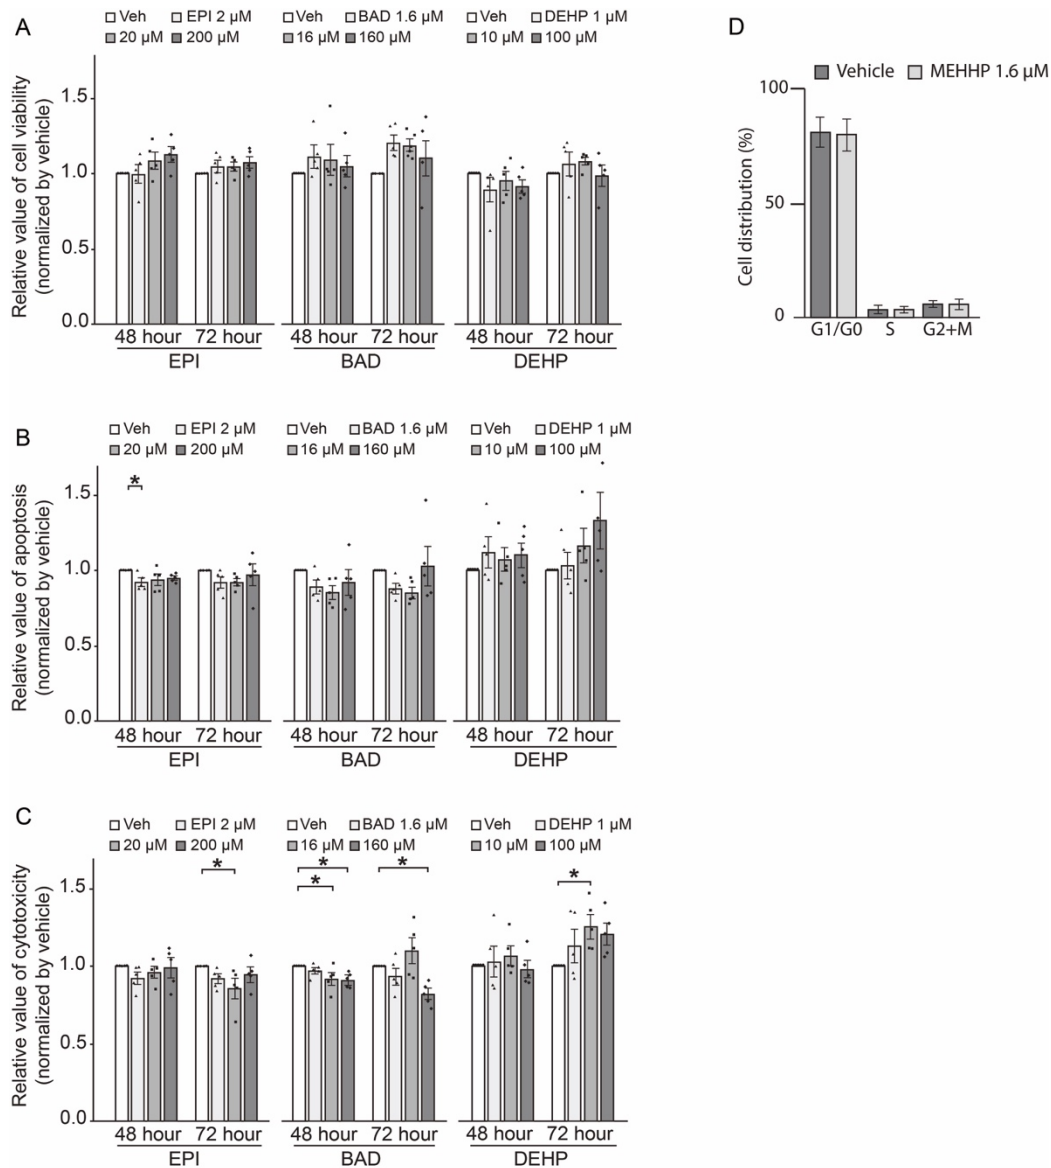

**Figure S3. Phthalate metabolites increase viability and decrease apoptosis in leiomyoma cells**

A to D: LM cells were treated with various concentrations of the EPI mixture (2, 20, 200 μM), BAD mixture (1.6, 16, 160 μM), and DEHP alone (1, 10, 100 μM) for 48 or 72 h. Cell viability (A), apoptosis (B), and cytotoxicity (C) were assessed with the ApoTox-Glo Triplex Assay kit (n = 5). D: LM cells were treated with vehicle or MEHHP (1.6 μM) for 72 h, and BrdU was added for the last 24 h. The cells were then analyzed by flow cytometry. Values are presented as mean ± SEM (n = 8). Statistical analysis was performed using student's t-test or Dennett's multiple comparison test. \* p < 0.05. BAD, bad actor (effect-based) mixture; EPI, epidemiological (exposure-based) mixture.

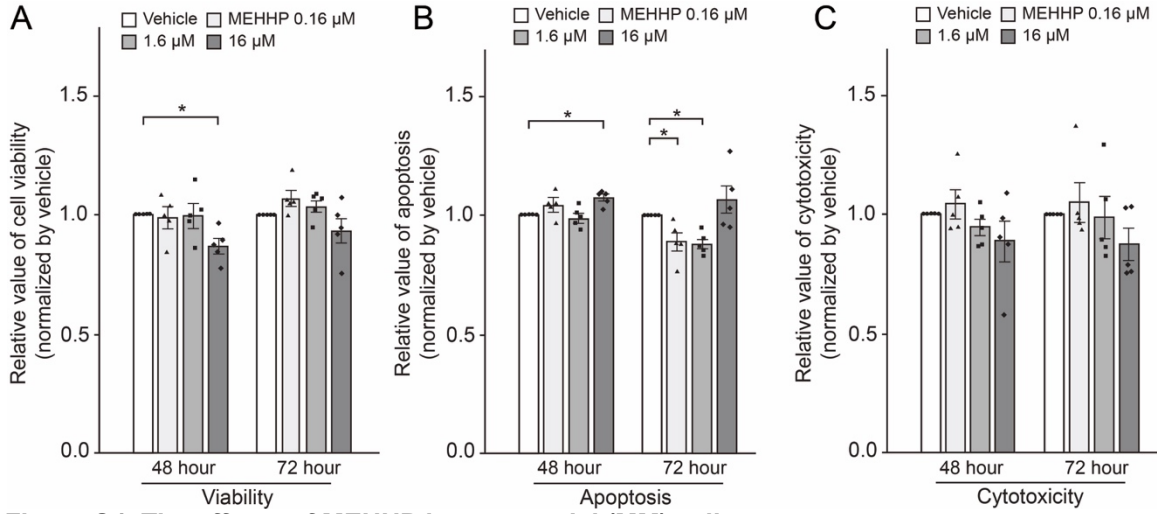

**Figure S4. The effects of MEHHP in myometrial (MM) cells**

A to C: MM cells were treated with various concentrations of the MEHHP (0.16, 1.6, 16  $\mu\text{M}$ ) for 48 or 72 h. Cell viability (A), apoptosis (B), and cytotoxicity (C) were assessed using the ApoTox-Glo Triplex Assay kit. Values were presented as mean  $\pm$  SEM (n = 5, in duplicate). Statistical analysis was performed using Dennett's multiple comparison test. \* p < 0.05.

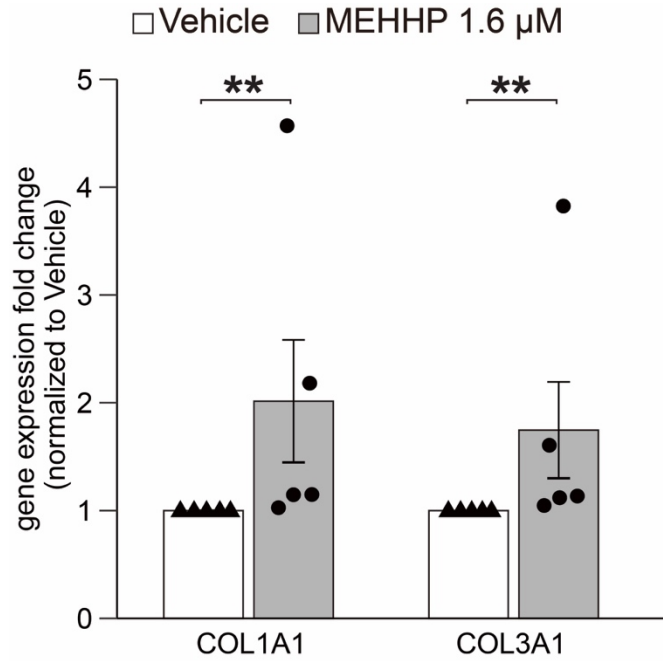

**Figure S5.** Bar graph showing RT-qPCR quantification of the expression of extracellular matrix genes COL1A1 and COL3A1 in LM cells treated with MEHHP (1.6 μM) or vehicle for 8 h. Statistical analysis was performed using Wilcoxon signed rank test (n=5). \*\* p < 0.01.

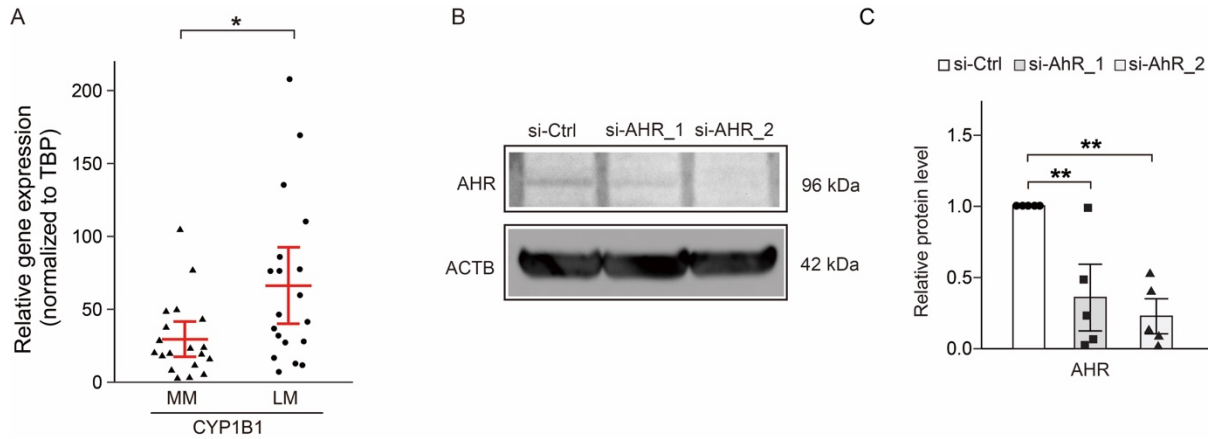

**Figure S6.**

A. Dot plot shows the distribution of CYP1B1 gene expression in LM and matched MM tissue. Data are expressed as means  $\pm$  95 % confidence interval (n=19 patient samples).

B: Representative Immunoblot image showing AHR protein expression in LM cells which were transfected with control siRNA (si-Ctrl) or two different AHR siRNAs (si-AHR\_1 and si-AHR\_2). C: Image J quantification of AHR protein levels in B. Values are presented as mean  $\pm$  SEM (n = 5). Statistical analysis was performed using paired student's t-test or Dennett's multiple comparison test compared with control. \*  $p < 0.05$ , \*\*  $p < 0.01$ .



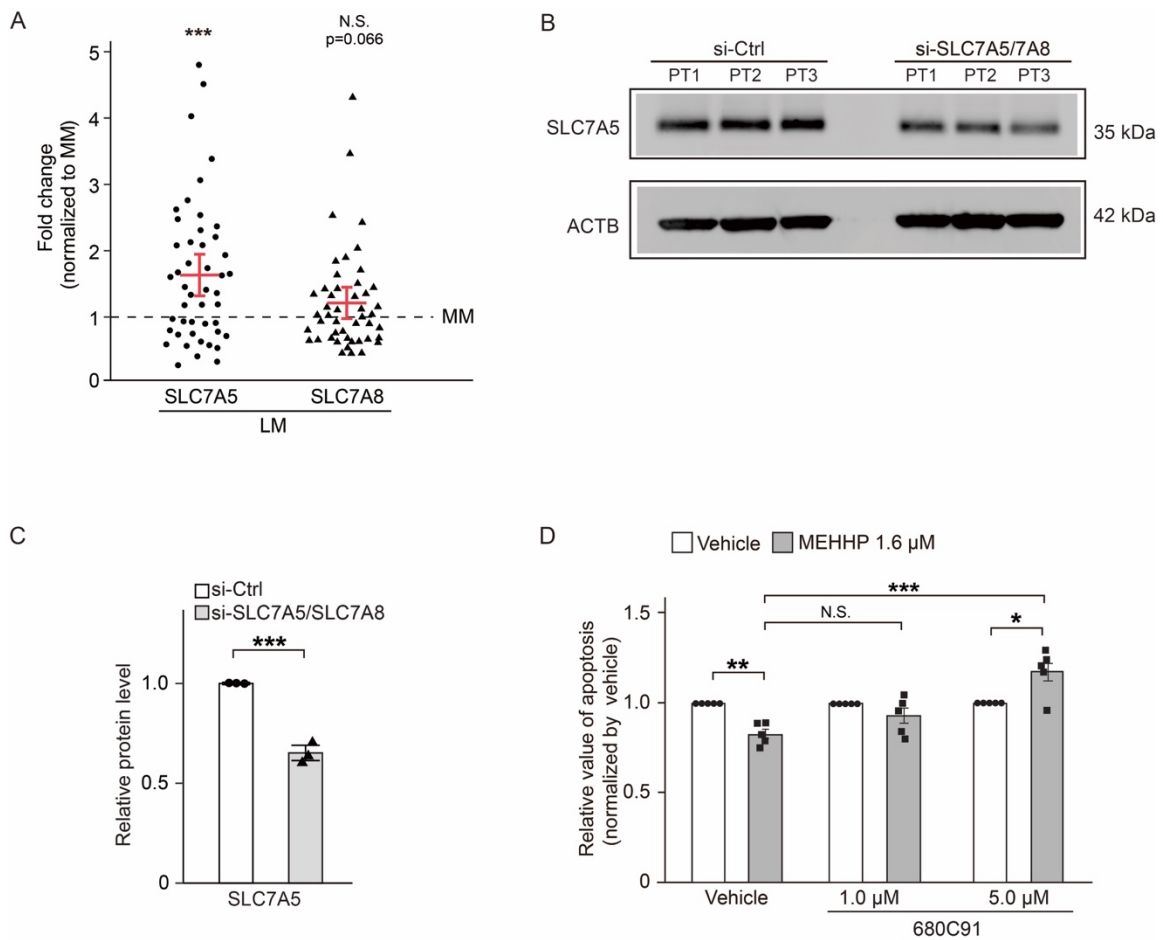

**Figure S7.**

A: Dot plot shows the fold change for SLC7A5 and SLC7A8 mRNA levels in LM tissue relative to matched MM tissue. Data are expressed as means  $\pm$  95 % confidence interval (n=47).

B: Representative Immunoblot image showing SLC7A5 protein expression in LM cells which were transfected with control siRNA (si-Ctrl) or SLC7A5 and SLC7A8 siRNAs. C: Image J quantification of AHR protein levels in B. Values are presented as mean  $\pm$  SEM (n = 3).

D: LM cells were treated with the TDO2-specific inhibitor 680C91 at 1  $\mu$ M and 5  $\mu$ M for 72 h. Apoptosis was assessed by evaluation of Caspase 3/7 activity. Values were normalized to vehicle control for each group and presented as mean  $\pm$  SEM (n = 5). Statistical analysis was performed using paired student's t-test or Dennett's multiple comparison test compared with control. \* p < 0.05, \*\* p < 0.01, \*\*\* p < 0.001.

**Table S1. Composition of phthalate mixtures used in the study**

| EPI mixture (exposure-based mixture) |             |      |     | Stock solution |       | Working concentration (Low dose) |        |
|--------------------------------------|-------------|------|-----|----------------|-------|----------------------------------|--------|
| Parent                               | Metabolites | %    | MW  | mM             | mg/ml | µM                               | ng/ml  |
| DEHP                                 | MEHP        | 1.3  | 278 | 3.47           | 0.97  | 0.026                            | 7.235  |
|                                      | MEOHP       | 3.1  | 292 | 8.28           | 2.42  | 0.06                             | 18.13  |
|                                      | MECPP       | 6.4  | 308 | 17.09          | 5.26  | 0.12                             | 39.48  |
|                                      | MEHHP       | 8.1  | 294 | 21.63          | 6.36  | 0.162                            | 47.69  |
| DiBP                                 | MiBP        | 5.3  | 222 | 14.15          | 3.14  | 0.10                             | 23.56  |
| DEP                                  | MEP         | 65.6 | 194 | 175.15         | 33.98 | 1.31                             | 254.84 |
| BBzP                                 | MBzP        | 2.6  | 256 | 6.94           | 1.78  | 0.05                             | 13.32  |
| DBP                                  | MBP         | 6.7  | 222 | 17.89          | 3.97  | 0.13                             | 29.78  |
| DOP                                  | MCPP        | 0.8  | 252 | 2.14           | 0.54  | 0.016                            | 4.04   |
|                                      |             |      |     |                |       |                                  |        |
|                                      | SUM         | 99.9 |     | 267            | 58.42 | 2.00                             | 438.1  |

| BAD mixture (effect-based mixture) |             |      |     | Stock solution |       | Working concentration (Low dose) |        |
|------------------------------------|-------------|------|-----|----------------|-------|----------------------------------|--------|
| Parent                             | Metabolites | %    | MW  | mM             | mg/ml | µM                               | ng/ml  |
| DEHP                               | MEHHP       | 9.9  | 294 | 21.63          | 6.36  | 0.16                             | 47.69  |
| DiBP                               | MiBP        | 6.5  | 222 | 14.15          | 3.14  | 0.10                             | 23.56  |
| DEP                                | MEP         | 80.3 | 194 | 175.15         | 33.98 | 1.31                             | 254.84 |
| BBzP                               | MBzP        | 3.2  | 256 | 6.94           | 1.78  | 0.05                             | 13.32  |
|                                    |             |      |     |                |       |                                  |        |
|                                    | SUM         | 99.9 |     | 217.87         | 45.26 | 1.63                             | 33.94  |

| MEHHP  |             |       |     | Stock solution |       | Working concentration (Low dose) |       |
|--------|-------------|-------|-----|----------------|-------|----------------------------------|-------|
| Parent | Metabolites | %     | MW  | mM             | mg/ml | µM                               | ng/ml |
| DEHP   | MEHHP       | 100.0 | 294 | 21.63          | 6.36  | 0.162                            | 47.69 |

| DEHP |       |     | Stock solution |       | Working concentration (Low dose) |        |
|------|-------|-----|----------------|-------|----------------------------------|--------|
|      | %     | MW  | mM             | mg/ml | µM                               | ng/ml  |
|      | 100.0 | 294 | 133.17         | 52.07 | 0.100                            | 390.53 |

DBP, di-butylphthalate; BBzP, butyl benzyl phthalat; DEP, di-ethyl phthalate; DiBP, di-isobutyl phthalate; DPB, di-butyl phthalate;

**Table S2. Median (25<sup>th</sup>, 75<sup>th</sup> percentiles) concentrations of individual urinary phthalate metabolites and phthalate molar sums of the MWHS.**

| Name                                    | Abbreviation                              | MWHS (2006-2015)<br>n=728                                                   |
|-----------------------------------------|-------------------------------------------|-----------------------------------------------------------------------------|
|                                         | <b>Phthalate metabolite</b>               | <b>Median (25<sup>th</sup>, 75<sup>th</sup> percentiles) in<br/>ng/mL</b>   |
| Monoethyl phthalate                     | MEP                                       | 97.3 (48.2, 192.0) <sup>#</sup>                                             |
| Mono-n-butyl phthalate                  | MBP                                       | 19.8 (13.0, 32.8)                                                           |
| Mono-isobutyl phthalate                 | MiBP                                      | 16.4 (10.0, 26.1)                                                           |
| Mono(3-carboxypropyl) phthalate         | MCPP                                      | 2.5 (1.3, 5.4)                                                              |
| Monobenzyl phthalate                    | MBzP                                      | 9.4 (5.4, 16.1)                                                             |
| Mono(2-ethylhexyl) phthalate            | MEHP                                      | 4.5 (2.7, 9.3)                                                              |
| Mono(2-ethyl-5-hydroxyhexyl) phthalate  | MEHHP                                     | 33.5 (20.5, 58.7)                                                           |
| Mono(2-ethyl-5-oxohexyl) phthalate      | MEOHP                                     | 12.0 (7.3, 22.4)                                                            |
| Mono(2-ethyl-5-carboxypentyl) phthalate | MECPP                                     | 25.9 (15.9, 48.0)                                                           |
|                                         | <b>Phthalate molar-<br/>converted sum</b> | <b>Median (25<sup>th</sup>, 75<sup>th</sup> percentiles) in<br/>nmol/mL</b> |
| Di(2-ethylhexyl) phthalate              | DEHP                                      | 0.3 (0.2, 0.5)                                                              |

<sup>#</sup> Two samples (0.3%) were <LOD for MEP.

**Table S3. Geometric mean of urinary phthalate metabolite concentrations in women with and without LMs.**

|                |     | MEHP           | MEHHP           | MEOHP           | MECPP           | MCPP           | MBzP            | MEP               | MBP             | MiBP            |
|----------------|-----|----------------|-----------------|-----------------|-----------------|----------------|-----------------|-------------------|-----------------|-----------------|
| LMs            | n   | GM<br>(SE)     | GM<br>(SE)      | GM<br>(SE)      | GM<br>(SE)      | GM<br>(SE)     | GM<br>(SE)      | GM<br>(SE)        | GM<br>(SE)      | GM<br>(SE)      |
| yes            | 207 | 5.88<br>(0.36) | 39.81<br>(2.04) | 15.51<br>(0.9)  | 32.55<br>(1.85) | 2.95<br>(0.22) | 9.44<br>(0.45)  | 131.11<br>(11.87) | 22.73<br>(1.08) | 19.66<br>(0.96) |
| no             | 547 | 5.53<br>(0.21) | 34.90<br>(1.08) | 13.65<br>(0.47) | 29.29<br>(0.98) | 3.03<br>(0.14) | 10.41<br>(0.37) | 100.18<br>(4.71)  | 21.6<br>(0.57)  | 16.83<br>(0.48) |
| <b>P-value</b> |     | 0.329          | 0.011*          | 0.025*          | 0.072           | 0.812          | 0.200           | 0.0007***         | 0.388           | 0.005**         |

Values in the table indicate concentrations in urinary phthalate metabolite (ng/ml) of women in MWHS. Statistical analysis was performed using Kruskal Wallis test to compare geometric mean of phthalate metabolite concentrations in women with and without LMs. \*  $p < 0.05$ , \*\*  $< 0.01$ , \*\*\*  $0.001$ . GE, geometric mean; SE, standard error.

**Table S4. Chemicals and inhibitors used in the study**

| <b>Chemical</b> | <b>Chemical Name</b>                      | <b>CAS #</b> | <b>Catalog</b> | <b>Company</b> |
|-----------------|-------------------------------------------|--------------|----------------|----------------|
| DMSO            | Dimethyl sulfoxide                        | 67-68-5      | D2650          | Sigma          |
| MEHHP           | Mono-(2-ethyl-5-hydroxyhexyl) phthalate   | 40321-99-1   | M542510        | TRC            |
| MEHP            | Mono-(ethylhexyl) phthalate               | 4376-20-9    | M545290        | TRC            |
| MEOHP           | Mono-(2-ethyl-5-oxohexyl) phthalate       | 40321-98-0   | M542520        | TRC            |
| MECPP           | Mono-(5-carboxyl-2-ethylpentyl) phthalate | 40809-41-4   | M525550        | TRC            |
| MiBP            | Monoisobutyl phthalate                    | 30833-52-5   | M525635        | TRC            |
| MBzP            | Monobenzyl phthalate                      | 2528-16-7    | M524900        | TRC            |
| MCPP            | Mono-(3-carboxypropyl) phthalate          | 66851-46-5   | M547700        | TRC            |
| MEP             | Monoethyl phthalate                       | 2306-33-4    | M542580        | TRC            |
| MBP             | Monobutyl phthalate                       | 131-70-4     | M525100        | TRC            |
| DEHP            | Diocetyl phthalate                        | 117-81-7     | D201154        | Sigma          |
| TCDD            | 2,3,7,8-tetrachlorodibenzo-p-dioxin       | 1746-01-6    | ED-901-B       | CIL            |

| <b>Inhibitors</b> | <b>Description</b>                      | <b>Catalog</b> | <b>Company</b> |
|-------------------|-----------------------------------------|----------------|----------------|
| CH-223191         | Antagonist of aryl hydrocarbon receptor | T2448          | TargetMol      |
| 680C91            | TDO2 inhibitor                          | SML0287        | Sigma-Aldrich  |

TRC, Toronto Research Chemicals; CIL, Cambridge Isotope Laboratories.

**Table S5. Primers and siRNAs used in the study**

| <b>Primers for PrimeTime Std® qPCR Assay</b><br>(Purchased from Integrated DNA Technologies) |                     |
|----------------------------------------------------------------------------------------------|---------------------|
| AHR                                                                                          | Hs.PT.56a.38998805  |
| CYP1A1                                                                                       | Hs.PT.58.219047     |
| CYP1B1                                                                                       | Hs.PT.58.25328727.g |
| HPRT1                                                                                        | Hs.PT.58v.45621572  |
| SLC7A8                                                                                       | Hs.PT.58.40151777   |
| SLC7A5                                                                                       | Hs.PT.58.25972702   |
| TDO2                                                                                         | Hs.PT.58.3092178    |
| COL1A1                                                                                       | Hs.PT.58.15517795   |
| COL3A1                                                                                       | Hs.PT.58.4249241    |
| <b>On-target plus siRNA</b> (purchased from Horizon Discovery)                               |                     |
| Human AHR                                                                                    | J-004990-05-0005    |
|                                                                                              | J-004990-06-0005    |
| Human SLC7A5                                                                                 | J-004953-12-0005    |
| Human SLC7A8                                                                                 | J-007618-09-0005    |
| Human TDO2                                                                                   | J-008506-09-0005    |
|                                                                                              | J-008506-10-0005    |
| Non-targeting Pool                                                                           | D-001810-10-05      |

**Table S6. Antibodies used in the study**

| <b>Antibodies (Dilution)</b>                   | <b>Catalog No.</b> | <b>Company</b>            |
|------------------------------------------------|--------------------|---------------------------|
| AHR [RPT1] (1/1,000)                           | GTX22770           | GeneTex                   |
| SLC7A5 (1/1,000)                               | 28670-1-AP         | Proteintech               |
| Beta Actin (1/15,000)                          | HRP-60008          | Proteintech               |
| Anti-mouse IgG, HRP-linked Antibody (1/5,000)  | 7076S              | Cell Signaling Technology |
| Anti-rabbit IgG, HRP-linked Antibody (1/5,000) | 7074S              | Cell Signaling Technology |

**Table S7. Weighted quantile sum (WQS) cohort characteristics**

| <b>Characteristic</b>               | <b>N=654</b>     |
|-------------------------------------|------------------|
| Estradiol, median (min-max) (ng/ml) | 56.2 (5.6-355.1) |
| BMI, median (min-max)               | 26.5 (15.6-67.7) |
| Menopausal status, n (%)            |                  |
| Premenopausal                       | 384 (59)         |
| Perimenopausal                      | 270 (41)         |
| Race, n (%)                         |                  |
| White                               | 447 (68)         |
| Black                               | 207 (32)         |
| Smoking status, n (%)               |                  |
| Never smoker                        | 358 (55)         |
| Former smoker                       | 229 (35)         |
| Current smoker                      | 67 (10)          |

BMI, body mass index

| <b>Parent</b> | <b>Metabolite</b> | <b>Arithmetic mean</b> | <b>Geometric mean</b> | <b>Min.</b> | <b>1st Qu.</b> | <b>Median</b> | <b>3rd Qu.</b> | <b>Max.</b> |
|---------------|-------------------|------------------------|-----------------------|-------------|----------------|---------------|----------------|-------------|
| DEHP          | MEHHP             | 53.83                  | 44.40                 | 5.92        | 29.81          | 45.18         | 67.08          | 244.17      |
|               | MEHP              | 8.99                   | 6.66                  | 0.40        | 4.10           | 6.36          | 10.28          | 51.97       |
|               | MEOHP             | 21.75                  | 17.00                 | 2.81        | 10.80          | 15.45         | 25.80          | 128.35      |
|               | MECPP             | 46.24                  | 36.36                 | 7.60        | 22.71          | 33.73         | 56.37          | 267.13      |
| DiBP          | MiBP              | 27.11                  | 22.40                 | 1.40        | 14.86          | 21.79         | 33.20          | 132.63      |
| BBzP          | MBzP              | 16.60                  | 12.80                 | 1.55        | 7.87           | 12.64         | 20.08          | 95.56       |
| DOP           | MCPP              | 5.73                   | 3.66                  | 0.24        | 1.92           | 3.44          | 6.91           | 41.52       |
| DEP           | MEP               | 376.05                 | 245.04                | 0.43        | 133.60         | 340.09        | 552.75         | 2342.40     |
| DBP           | MBP               | 33.03                  | 27.80                 | 3.00        | 19.09          | 27.32         | 39.59          | 154.80      |

Values in the table indicate concentrations in urinary phthalate metabolite concentration (ng/ml) of women in MWHS. Qu, quartile.



**Table S8. Summary statistics for the full cohort, N=742-765**

| Parent | Metabolite | n   | Arithmetic mean | Geometric mean | Min. | 1st Qu. | Median | 3rd Qu. | Max.    |
|--------|------------|-----|-----------------|----------------|------|---------|--------|---------|---------|
| DEHP   | MEHHP      | 750 | 56.80           | 45.98          | 5.92 | 29.93   | 46.27  | 69.03   | 306.00  |
|        | MEHP       | 742 | 9.42            | 6.90           | 0.40 | 4.14    | 6.47   | 10.60   | 53.87   |
|        | MEOHP      | 744 | 22.86           | 17.53          | 2.81 | 10.94   | 15.79  | 26.83   | 128.35  |
|        | MECPP      | 745 | 48.74           | 37.69          | 7.60 | 23.35   | 35.28  | 58.80   | 289.60  |
| DiBP   | MiBP       | 755 | 27.44           | 22.67          | 1.40 | 15.09   | 22.29  | 33.54   | 132.63  |
| BBzP   | MBzP       | 750 | 16.67           | 12.90          | 1.55 | 7.95    | 12.72  | 20.08   | 95.56   |
| DOP    | MCPP       | 749 | 5.90            | 3.74           | 0.24 | 1.97    | 3.55   | 7.29    | 41.52   |
| DEP    | MEP        | 765 | 373.69          | 244.55         | 0.29 | 136.70  | 330.67 | 548.57  | 2342.40 |
| DBP    | MBP        | 759 | 34.12           | 28.65          | 3.00 | 19.37   | 27.69  | 41.63   | 154.80  |

Values in the table indicate concentrations in urinary phthalate metabolite concentration (ng/ml) of women in MWHS. Qu, quartile.

## References

1. C. G. Bornehag *et al.*, A Novel Approach to Chemical Mixture Risk Assessment-Linking Data from Population-Based Epidemiology and Experimental Animal Tests. *Risk Anal* **39**, 2259-2271 (2019).
2. C. Chiang *et al.*, Urinary phthalate metabolite concentrations and serum hormone levels in pre- and perimenopausal women from the Midlife Women's Health Study. *Environ Int* **156**, 106633 (2021).
3. J. W. George *et al.*, Integrated Epigenome, Exome, and Transcriptome Analyses Reveal Molecular Subtypes and Homeotic Transformation in Uterine Fibroids. *Cell Rep* **29**, 4069-4085 e4066 (2019).
4. M. B. Moyo, J. B. Parker, D. Chakravarti, Altered chromatin landscape and enhancer engagement underlie transcriptional dysregulation in MED12 mutant uterine leiomyomas. *Nat Commun* **11**, 1019 (2020).
5. J. R. Leistico *et al.*, Epigenomic tensor predicts disease subtypes and reveals constrained tumor evolution. *Cell Rep* **34**, 108927 (2021).
